# Supplementary material
Source: Royal Society of Chemistry journal article supplement (doi:10.1039/d6dt00859c)
Supplement: d6dt00859c1.pdf [file d6dt00859c1.pdf]

# Fabrication of Al-doped ZnO microspheres as negative materials for superior cycling stability in nickel-zinc secondary batteries

Zijing Wu <sup>a,#</sup>, Chenhan Xiong <sup>a,b,c,#</sup>, Wei Wang <sup>a,#</sup>, Yanqiu Yu <sup>a</sup>, Guoping Du <sup>a,\*</sup>, Nan Chen <sup>a\*</sup>

a. School of Physics and Materials Science, Nanchang University, Nanchang 330031, China

b. Jiangxi General Institute of Testing and Certification, Nanchang 330052, China

c. Jiangxi Institute of Quality and Standardization, Nanchang 330052, China

\* Corresponding authors, email addresses: [guopingdu@ncu.edu.cn](mailto:guopingdu@ncu.edu.cn) (GD), [nanchen@ncu.edu.cn](mailto:nanchen@ncu.edu.cn) (NC)

# These authors (Z. Wu, C. Xiong and Wei. Wang) contributed equally to this article.

## Figure and Table Captions

**Figure S1.** Nitrogen adsorption-desorption isotherms and the corresponding pore size distribution of AZO<sub>0</sub> (a), AZO<sub>3</sub> (b), AZO<sub>10</sub> (c) and AZO<sub>15</sub> (d).

**Figure S2.** CV curves of pure AZO and AZO<sub>x</sub> electrodes at different scan rates. (a) pure ZnO, (b) AZO<sub>0</sub>, (c) AZO<sub>3</sub>, (d) AZO<sub>5</sub>, (e) AZO<sub>10</sub>, (f) AZO<sub>15</sub>.

**Figure S3.** GCD curves of the assembled Ni-Zn batteries based on pure ZnO and AZO<sub>x</sub> electrodes at different current densities. (a) pure ZnO, (b) AZO<sub>0</sub>, (c) AZO<sub>3</sub>, (d) AZO<sub>5</sub>, (e) AZO<sub>10</sub>, (f) AZO<sub>15</sub>.

**Table S1.** Molar data of different aluminum doped zinc oxide samples

**Table S2.** The pore structure parameters of pure ZnO and AZO<sub>x</sub> composites

**Table S3.** The Tafel data of pure ZnO and five different AZO<sub>x</sub> electrode materials

**Table 4.** The EIS data of pure ZnO and five different AZO<sub>x</sub> electrode materials

**Table S5.** Comparison of cycle performance between Al-doped AZO<sub>5</sub> composites and some reported anode materials for Ni-Zn batteries

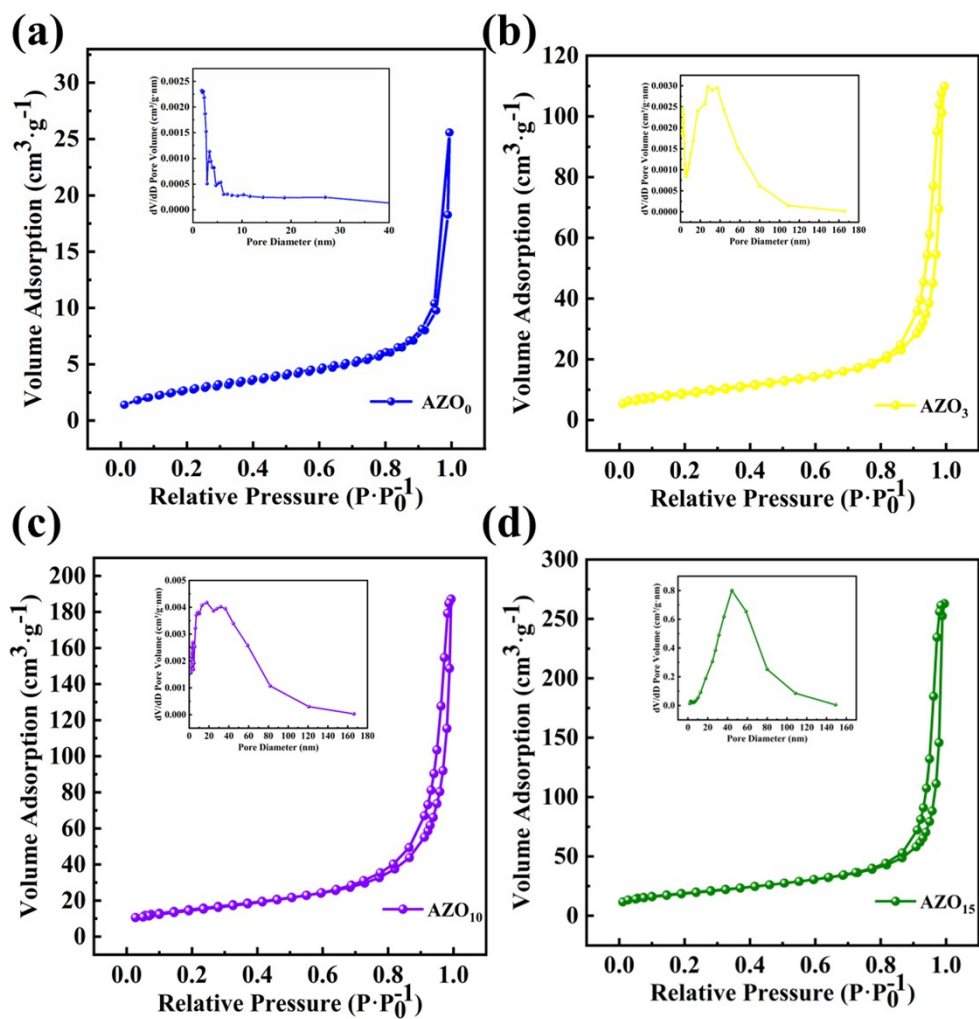

**Figure S1.** Nitrogen adsorption-desorption isotherms and the corresponding pore size distribution of AZO<sub>0</sub> (a), AZO<sub>3</sub> (b), AZO<sub>10</sub> (c) and AZO<sub>15</sub> (d).

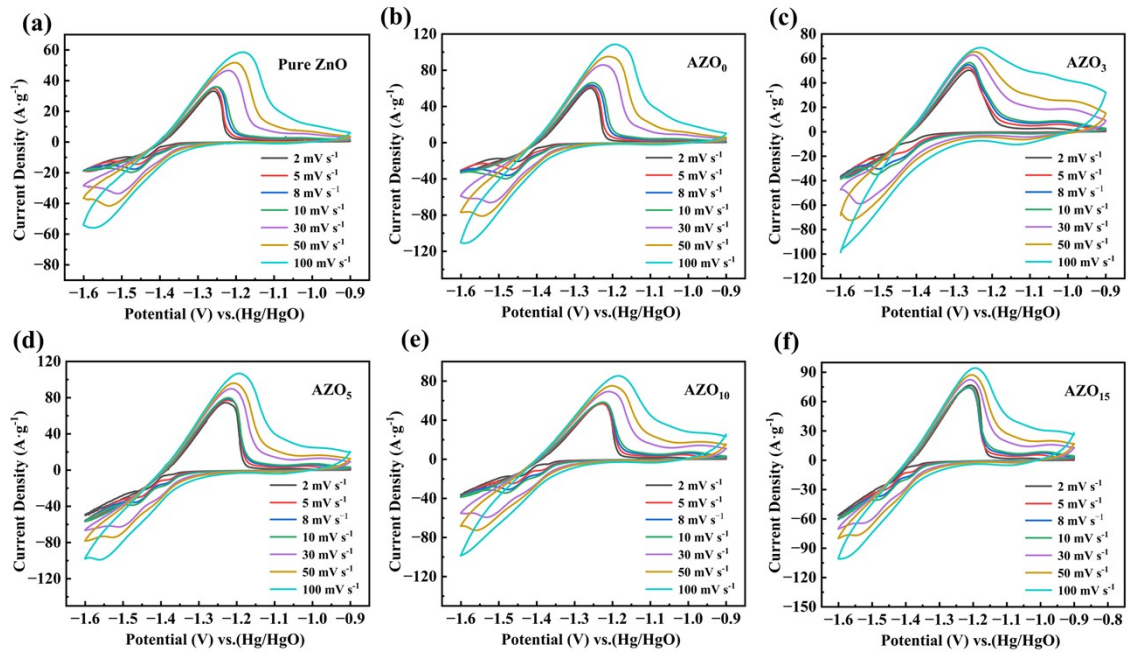

**Figure S2.** CV curves of pure AZO and AZO<sub>x</sub> electrodes at different scan rates. (a) pure ZnO, (b) AZO<sub>0</sub>, (c) AZO<sub>3</sub>, (d) AZO<sub>5</sub>, (e) AZO<sub>10</sub>, (f) AZO<sub>15</sub>.

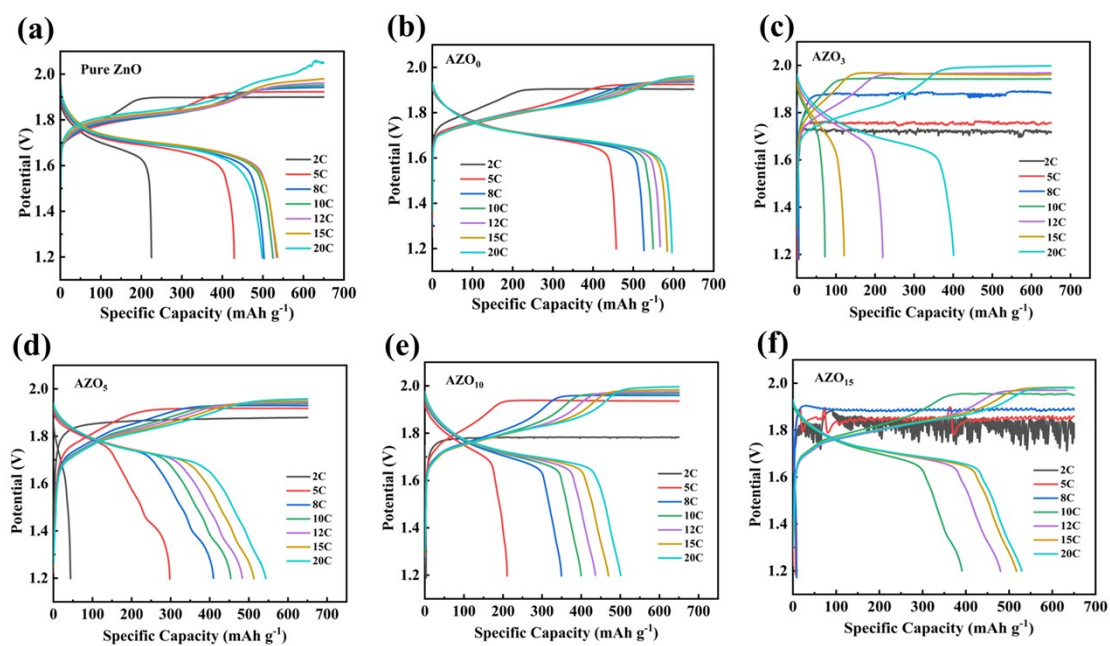

**Figure S3.** GCD curves of the assembled Ni-Zn batteries based on pure ZnO and AZO<sub>x</sub> electrodes at different current densities. (a) pure ZnO, (b) AZO<sub>0</sub>, (c) AZO<sub>3</sub>, (d) AZO<sub>5</sub>, (e) AZO<sub>10</sub>, (f) AZO<sub>15</sub>.

**Table S1.** Molar data of different aluminum doped zinc oxide samples

| <b>Sample</b>           | <b>Percentage<br/>of Al<br/>doping (%)</b> | <b>Zn(Ac)<sub>2</sub>·2H<sub>2</sub>O<br/>Amount<br/>(mmol)</b> | <b>CO(NH<sub>2</sub>)<sub>2</sub><br/>Amount<br/>(mmol)</b> | <b>C<sub>6</sub>H<sub>12</sub>O<sub>6</sub>·H<sub>2</sub>O<br/>Amount<br/>(mmol)</b> | <b>Al(NO<sub>3</sub>)<sub>3</sub>·9H<sub>2</sub>O<br/>Amount<br/>(mmol)</b> |
|-------------------------|--------------------------------------------|-----------------------------------------------------------------|-------------------------------------------------------------|--------------------------------------------------------------------------------------|-----------------------------------------------------------------------------|
| <b>AZO<sub>0</sub></b>  | <b>0</b>                                   | <b>10</b>                                                       | <b>30</b>                                                   | <b>20</b>                                                                            | <b>0</b>                                                                    |
| <b>AZO<sub>3</sub></b>  | <b>0.3</b>                                 | <b>9.7</b>                                                      | <b>30</b>                                                   | <b>20</b>                                                                            | <b>0.3</b>                                                                  |
| <b>AZO<sub>5</sub></b>  | <b>0.5</b>                                 | <b>9.5</b>                                                      | <b>30</b>                                                   | <b>20</b>                                                                            | <b>0.5</b>                                                                  |
| <b>AZO<sub>10</sub></b> | <b>1.0</b>                                 | <b>9.0</b>                                                      | <b>30</b>                                                   | <b>20</b>                                                                            | <b>1.0</b>                                                                  |
| <b>AZO<sub>15</sub></b> | <b>1.5</b>                                 | <b>8.5</b>                                                      | <b>30</b>                                                   | <b>20</b>                                                                            | <b>1.5</b>                                                                  |

**Table S2.** The pore structure parameters of pure ZnO and AZO<sub>x</sub> composites

| <b>Material</b>         | <b>Specific surface area (m<sup>2</sup>·g<sup>-1</sup>)</b> | <b>Average pore diameter (nm)</b> |
|-------------------------|-------------------------------------------------------------|-----------------------------------|
| <b>Pure ZnO</b>         | <b>3.543</b>                                                | <b>9.054</b>                      |
| <b>AZO<sub>0</sub></b>  | <b>9.925</b>                                                | <b>14.521</b>                     |
| <b>AZO<sub>3</sub></b>  | <b>32.277</b>                                               | <b>22.861</b>                     |
| <b>AZO<sub>5</sub></b>  | <b>35.387</b>                                               | <b>28.817</b>                     |
| <b>AZO<sub>10</sub></b> | <b>53.987</b>                                               | <b>22.724</b>                     |
| <b>AZO<sub>15</sub></b> | <b>68.108</b>                                               | <b>26.129</b>                     |

**Table S3.** The Tafel data of pure ZnO and five different AZO<sub>x</sub> electrode materials

| <b>Electrode Material</b> | <b>Corrosion Potential<br/><math>E_{\text{corr}}</math> (V)</b> | <b>Corrosion Current Density<br/><math>I_{\text{corr}}</math> (<math>\times 10^{-2}</math> mA cm<sup>-2</sup>)</b> |
|---------------------------|-----------------------------------------------------------------|--------------------------------------------------------------------------------------------------------------------|
| <b>Pure ZnO</b>           | <b>-1.396</b>                                                   | <b>0.173</b>                                                                                                       |
| <b>AZO<sub>0</sub></b>    | <b>-1.385</b>                                                   | <b>0.141</b>                                                                                                       |
| <b>AZO<sub>3</sub></b>    | <b>-1.374</b>                                                   | <b>0.157</b>                                                                                                       |
| <b>AZO<sub>5</sub></b>    | <b>-1.373</b>                                                   | <b>0.151</b>                                                                                                       |
| <b>AZO<sub>10</sub></b>   | <b>-1.379</b>                                                   | <b>0.151</b>                                                                                                       |
| <b>AZO<sub>15</sub></b>   | <b>-1.378</b>                                                   | <b>0.220</b>                                                                                                       |

**Table S4.** The EIS data of pure ZnO and five different AZO<sub>x</sub> electrode materials

| <b>Electrode Material</b> | <b>Rs (<math>\Omega</math>)</b> | <b>Rct (<math>\Omega</math>)</b> |
|---------------------------|---------------------------------|----------------------------------|
| <b>Pure ZnO</b>           | <b>0.652</b>                    | <b>8.387</b>                     |
| <b>AZO<sub>0</sub></b>    | <b>0.606</b>                    | <b>4.755</b>                     |
| <b>AZO<sub>3</sub></b>    | <b>0.997</b>                    | <b>13.090</b>                    |
| <b>AZO<sub>5</sub></b>    | <b>0.565</b>                    | <b>3.543</b>                     |
| <b>AZO<sub>10</sub></b>   | <b>0.868</b>                    | <b>8.057</b>                     |
| <b>AZO<sub>15</sub></b>   | <b>0.597</b>                    | <b>4.962</b>                     |

**Table S5.** Comparison of cycle performance between Al-doped AZO<sub>5</sub> composites and some reported anode materials for Ni-Zn batteries

| <b>Material</b>                            | <b>Rate Capability</b> | <b>Cycle Number</b> | <b>Average Specific Discharge Capacity (mAh g<sup>-1</sup>)</b> | <b>References</b>   |
|--------------------------------------------|------------------------|---------------------|-----------------------------------------------------------------|---------------------|
| <b>ZnO/carbon nanotube</b>                 | <b>1 C</b>             | <b>600</b>          | <b>410</b>                                                      | [1]                 |
| <b>ZnO@RGO</b>                             | <b>1 C</b>             | <b>300</b>          | <b>510</b>                                                      | [2]                 |
| <b>Prismatic carbon-coated ZnO</b>         | <b>1 C</b>             | <b>300</b>          | <b>489</b>                                                      | [3]                 |
| <b>NC@ZnO composite</b>                    | <b>1 C</b>             | <b>945</b>          | <b>531</b>                                                      | [4]                 |
| <b>ZnO@In<sub>2</sub>O<sub>3</sub></b>     | <b>2 C</b>             | <b>80</b>           | <b>520</b>                                                      | [5]                 |
| <b>ZnO@ZIF-8</b>                           | <b>5 C</b>             | <b>1150</b>         | <b>590</b>                                                      | [6]                 |
| <b>ZnO@SnO<sub>2</sub></b>                 | <b>10 C</b>            | <b>1000</b>         | <b>584</b>                                                      | [7]                 |
| <b>ZnO@TiC</b>                             | <b>6 C</b>             | <b>1500</b>         | <b>520</b>                                                      | [8]                 |
| <b>ZnO@Bi/C</b>                            | <b>1C</b>              | <b>180</b>          | <b>627</b>                                                      | [9]                 |
| <b>ZnO@ZnSe</b>                            | <b>10C</b>             | <b>1460</b>         | <b>577</b>                                                      | [10]                |
| <b>ZnO@NC</b>                              | <b>15C</b>             | <b>900</b>          | <b>595</b>                                                      | [11]                |
| <b>ZnO@MXene</b>                           | <b>10C</b>             | <b>1500</b>         | <b>594</b>                                                      | [12]                |
| <b>Al-doped AZO<sub>5</sub> composites</b> | <b>12 C</b>            | <b>1400</b>         | <b>570</b>                                                      | <b>In this work</b> |

## References

- [1] Cui C, Li M Q, Zhou X J, et al. Synthesis of ZnO/carbon nanotube composites for enhanced electrochemical performance of Ni-Zn secondary batteries[J]. Mater Res Bull, 2019, 112: 261-268.<http://dx.dor.org/10.1016/j.materresbull.2018.12.036>
- [2] Sun L S, Yi Z, Lin J, et al. Fast and Energy Efficient Synthesis of ZnO@RGO and its Application in Ni-Zn Secondary Battery[J]. J Phys Chem C, 2016, 120(23): 12337-12343.<http://dx.dor.org/10.1021/acs.jpcc.6b01025>
- [3] Feng Z B, Yang Z H, Huang J H, et al. The superior cycling performance of the hydrothermal synthesized carbon-coated ZnO as anode material for zinc-nickel secondary cells[J]. J Power Sources, 2015, 276: 162-169.<http://dx.dor.org/10.1016/j.jpowsour.2014.11.121>
- [4] Zeng X, Yang Z H, Cui F, et al. The dodecahedral Nitrogen-doped carbon coated ZnO composite derived from zeolitic imidazolate framework-8 with excellent cycling performance for zinc based rechargeable batteries[J]. J Power Sources, 2020, 463: 228193.<http://dx.dor.org/10.1016/j.jpowsour.2020.228193>
- [5] Ding J W, Zheng H Y, Gao H G, et al. Operando non-topological conversion constructing the high-performance nickel-zinc battery anode[J]. Chemical Engineering Journal, 2021, 414: 128716.<http://dx.dor.org/10.1016/j.cej.2021.128716>
- [6] Yuan L, Xu J C, Yang Z H, et al. Zinc oxide anode modified with zeolite imidazole structure achieve stable circulation for zinc-nickel secondary battery[J]. J Power Sources, 2022, 517: 230696.<http://dx.dor.org/10.1016/j.jpowsour.2021.230696>
- [7] Xu J C, Yuan L, Yang Z H, et al. ZnO@SnO Micron Flower as an Anode Material to Enhance the Cycling Performance of Zinc-Nickel Secondary Batteries[J]. Ind Eng Chem Res, 2022, 61(30): 10650-10659.<http://dx.dor.org/10.1021/acs.iecr.2c01359>
- [8] Long Y N, Li S D, Liang H H, et al. Football-like ZnO@TiC as the active material of zinc anode with excellent structural stability and long cycling performance[J]. Chem Eng Sci, 2024, 283: 119437.<http://dx.dor.org/10.1016/j.ces.2023.119437>
- [9] Zhao Z, Yang K, Peng K, et al. Synergistic effect of ZnO@Bi/C sphere for rechargeable Zn Ni battery with high specific capacity[J]. J Power Sources, 2019, 410-411: 10-14.<http://dx.dor.org/10.1016/j.jpowsour.2018.10.070>
- [10] Xu J, Liang H, Cai J, et al. Construction of ZnSe protective layer on zinc oxide for ultra-stable cycling of zinc-nickel batteries at high rates[J]. Chem Eng Sci, 2023, 281.<http://dx.dor.org/10.1016/j.ces.2023.119222>
- [11] Gao X, Zhang L, Luo Q, et al. Hierarchically porous structure and nitrogen-doped carbon layer synergistically enhance reaction kinetics and inhibit side reactions on ZnO anode for high-rate Ni-Zn batteries[J]. J Power Sources, 2025, 657.<http://dx.dor.org/10.1016/j.jpowsour.2025.238220>
- [12] Yuan L, Cai J, Xu J, et al. In situ growth of ZnO nanosheets on Ti3C2Tx MXene for Superior-Performance Zinc-Nickel secondary battery[J]. Chemical Engineering Journal, 2023, 451.<http://dx.dor.org/10.1016/j.cej.2022.139073>
